# Supplementary material
Source: Springer Nature journal article supplement (https://www.springermedizin.de/resource/supplementary/12885_2007_1133_MOESM3_ESM.pdf/9471192)

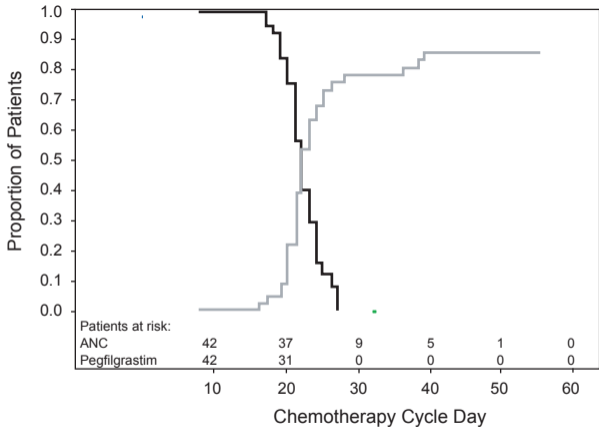

— Pegfilgrastim concentration > 2 ng/mL

— ANC after nadir  $\geq 0.5 \times 10^9/L$

Supplement: MOESM3 [file 9471192]
